# Supplementary material for: Hybrid compound based on diethylenetriaminecopper(ii) cations and scarce V-monosubstituted β-octamolybdate as water oxidation catalyst
Source: Royal Society of Chemistry journal article supplement (doi:10.1039/d1ra05030c), 2021-01-01
Supplement: d1ra05030c1.pdf [file d1ra05030c1.pdf]

## Electronic Supplementary Information

# Hybrid compound based on diethylenetriaminecopper(II) cations and scarce V-monosubstituted $\beta$ -octamolybdate as water oxidation catalyst

Halyna I. Buvailo,<sup>a</sup> Valeriya G. Makhankova,<sup>\*b</sup> Vladimir N. Kokozay,<sup>a</sup> Irina V. Omelchenko,<sup>c</sup> Svitlana V. Shishkina,<sup>c</sup> Alina Bieńko,<sup>d</sup> Mariia V. Pavliuk,<sup>e</sup> and Sergii I. Shylin<sup>\*e</sup>

<sup>a</sup> Department of Chemistry, Taras Shevchenko National University of Kyiv, Volodymyrska Street 64/13, 01601 Kyiv, Ukraine. E-mail: leram@univ.kiev.ua

<sup>b</sup> Institute of High Technologies, Taras Shevchenko National University of Kyiv, Hlushkova Avenue, 4g, 03022, Kyiv, Ukraine, E-mail: leram@univ.kiev.ua

<sup>c</sup> Institute for Single Crystals, National Academy of Sciences of Ukraine, Nauky Ave 60, 61001 Kharkiv, Ukraine.

<sup>d</sup> Faculty of Chemistry, University of Wrocław, F. Joliot-Curie 14, 50-383 Wrocław, Poland.

<sup>e</sup> Department of Chemistry – Ångström Laboratory, Uppsala University, P.O. Box 523, 75120 Uppsala, Sweden. E-mail: sergii.shylin@kemi.uu.se

### Table of Contents

|                                                                      |     |
|----------------------------------------------------------------------|-----|
| Crystallography details.....                                         | S2  |
| Figure S1: IR spectra.....                                           | S8  |
| Figure S2: Crystal structure.....                                    | S9  |
| Figure S3: Photocatalysis scheme.....                                | S10 |
| Figure S4. UV-Vis spectra of $[\text{Ru}(\text{bpy})]^{2+/3+}$ ..... | S11 |
| Figure S5. Cyclic voltammograms.....                                 | S12 |
| Figure S6. Bulk electrolysis.....                                    | S13 |

## Crystallography details

**Table S1.** Crystal data and structure refinement for **1**.

|                                             |                                                                                                   |
|---------------------------------------------|---------------------------------------------------------------------------------------------------|
| Empirical formula                           | C <sub>8</sub> H <sub>41</sub> Cu <sub>2</sub> Mo <sub>7</sub> N <sub>7</sub> O <sub>31.5</sub> V |
| Formula weight                              | 1589.08                                                                                           |
| Temperature/K                               | 298                                                                                               |
| Crystal system                              | monoclinic                                                                                        |
| Space group                                 | P2 <sub>1</sub> /n                                                                                |
| a/Å                                         | 9.8374(5)                                                                                         |
| b/Å                                         | 13.8773(7)                                                                                        |
| c/Å                                         | 14.1652(8)                                                                                        |
| α/°                                         | 90                                                                                                |
| β/°                                         | 93.260(5)                                                                                         |
| γ/°                                         | 90                                                                                                |
| Volume/Å <sup>3</sup>                       | 1930.65(17)                                                                                       |
| Z                                           | 2                                                                                                 |
| ρ <sub>calc</sub> /cm <sup>3</sup>          | 2.734                                                                                             |
| μ/mm <sup>-1</sup>                          | 3.609                                                                                             |
| F(000)                                      | 1530.0                                                                                            |
| Crystal size/mm <sup>3</sup>                | 0.6 × 0.5 × 0.4                                                                                   |
| Radiation                                   | MoKα (λ = 0.71073)                                                                                |
| 2θ range for data collection/°              | 6.466 to 64.96                                                                                    |
| Index ranges                                | -14 ≤ h ≤ 13, -19 ≤ k ≤ 18, -12 ≤ l ≤ 21                                                          |
| Reflections collected                       | 12738                                                                                             |
| Independent reflections                     | 6128 [R <sub>int</sub> = 0.0414, R <sub>sigma</sub> = 0.0623]                                     |
| Data/restraints/parameters                  | 6128/0/259                                                                                        |
| Goodness-of-fit on F <sup>2</sup>           | 1.054                                                                                             |
| Final R indexes [I >= 2σ (I)]               | R <sub>1</sub> = 0.0573, wR <sub>2</sub> = 0.1405                                                 |
| Final R indexes [all data]                  | R <sub>1</sub> = 0.0879, wR <sub>2</sub> = 0.1721                                                 |
| Largest diff. peak/hole / e Å <sup>-3</sup> | 1.98/-2.02                                                                                        |

**Table S2.** Fractional atomic coordinates ( $\times 10^4$ ) and equivalent isotropic displacement parameters ( $\text{\AA}^2 \times 10^3$ ) for **1**.

| Atom | x          | y          | z          | U(eq)     |
|------|------------|------------|------------|-----------|
| Mo1  | 1170.9(7)  | -279.1(5)  | 974.3(5)   | 30.48(17) |
| Mo2  | 1482.2(6)  | -1411.7(4) | -976.2(4)  | 34.43(15) |
| Mo3  | 1816.0(6)  | 636.4(4)   | -2045.3(5) | 38.89(16) |
| Mo4  | 1490.9(6)  | 1735.1(4)  | -62.8(4)   | 34.15(15) |
| V1   | 1170.9(7)  | -279.1(5)  | 974.3(5)   | 30.48(17) |
| O1   | 851(5)     | -1503(3)   | 328(3)     | 33.5(10)  |
| O2   | 492(5)     | -598(3)    | 2025(4)    | 38.8(10)  |
| O3   | 840(5)     | 1083(3)    | 1068(3)    | 34.4(9)   |
| O4   | 2828(5)    | -318(4)    | 1230(4)    | 41.8(11)  |
| O5   | 1070(5)    | -2525(4)   | -1401(4)   | 46.5(12)  |
| O6   | 1447(5)    | -717(4)    | -2136(4)   | 40.7(11)  |
| O7   | 3200(5)    | -1459(4)   | -685(4)    | 43.6(12)  |
| O8   | 3530(6)    | 572(4)     | -1762(4)   | 49.3(13)  |
| O9   | 1694(7)    | 953(4)     | -3213(4)   | 56.9(14)  |
| O10  | 1446(5)    | 1808(3)    | -1405(4)   | 40.5(11)  |
| O11  | 3196(5)    | 1639(4)    | 214(4)     | 44.7(12)  |
| O12  | 1119(6)    | 2916(3)    | 190(4)     | 49.0(13)  |
| O13  | 1197(5)    | 167(3)     | -490(3)    | 34.4(10)  |
| N1S  | 5000       | 0          | 0          | 41.1(19)  |
| Cu1  | 2687.5(12) | 689.5(7)   | 3664.4(9)  | 56.3(3)   |
| O1S  | 2219(10)   | -659(5)    | 3943(7)    | 97(3)     |
| O2S  | 3548(7)    | 820(4)     | 5234(5)    | 63.9(17)  |
| N1   | 4486(9)    | 309(6)     | 3187(6)    | 66(2)     |
| N2   | 3167(10)   | 1995(5)    | 3202(6)    | 68(2)     |
| N3   | 813(10)    | 1208(7)    | 3667(7)    | 79(3)     |
| C1   | 5236(12)   | 1167(8)    | 2907(8)    | 73(3)     |
| C2   | 4206(13)   | 1870(7)    | 2526(7)    | 74(3)     |
| C3   | 1928(13)   | 2468(7)    | 2818(8)    | 75(3)     |
| C4   | 876(12)    | 2271(7)    | 3495(8)    | 74(3)     |
| O3S  | -168(9)    | 1636(6)    | 5549(6)    | 66(2)     |

**Table S3.** Anisotropic displacement parameters ( $\text{\AA}^2 \times 10^3$ ) for **1**.

| Atom | U <sub>11</sub> | U <sub>22</sub> | U <sub>33</sub> | U <sub>23</sub> | U <sub>13</sub> | U <sub>12</sub> |
|------|-----------------|-----------------|-----------------|-----------------|-----------------|-----------------|
| Mo1  | 26.1(3)         | 27.0(3)         | 38.3(4)         | 1.9(3)          | 1.3(3)          | 0.5(2)          |
| Mo2  | 29.6(3)         | 30.2(3)         | 43.8(3)         | -0.7(2)         | 5.4(2)          | 2.1(2)          |
| Mo3  | 36.2(3)         | 37.2(3)         | 44.3(4)         | 1.7(2)          | 11.1(2)         | -3.1(2)         |
| Mo4  | 30.1(3)         | 27.3(3)         | 45.4(3)         | 0.0(2)          | 4.6(2)          | -3.32(19)       |
| V1   | 26.1(3)         | 27.0(3)         | 38.3(4)         | 1.9(3)          | 1.3(3)          | 0.5(2)          |
| O1   | 35(2)           | 25(2)           | 41(3)           | 3.8(18)         | 1.5(19)         | -2.5(16)        |
| O2   | 36(3)           | 40(3)           | 41(3)           | 1(2)            | 6(2)            | -1.9(19)        |
| O3   | 31(2)           | 33(2)           | 39(2)           | -1.4(19)        | 5.4(18)         | -3.3(18)        |
| O4   | 34(3)           | 42(3)           | 50(3)           | 4(2)            | 5(2)            | 3(2)            |
| O5   | 41(3)           | 36(3)           | 63(3)           | -6(2)           | 7(2)            | 1(2)            |
| O6   | 35(3)           | 44(3)           | 44(3)           | -2(2)           | 10(2)           | 5(2)            |
| O7   | 32(2)           | 50(3)           | 50(3)           | 1(2)            | 10(2)           | 3(2)            |
| O8   | 39(3)           | 48(3)           | 61(4)           | -5(3)           | 14(2)           | -5(2)           |
| O9   | 64(4)           | 59(3)           | 50(3)           | 3(3)            | 15(3)           | -4(3)           |
| O10  | 39(3)           | 35(2)           | 47(3)           | 4(2)            | 6(2)            | -2.0(19)        |
| O11  | 38(3)           | 44(3)           | 52(3)           | 0(2)            | 3(2)            | -7(2)           |
| O12  | 51(3)           | 28(2)           | 69(4)           | -3(2)           | 12(3)           | -2(2)           |
| O13  | 33(2)           | 33(2)           | 39(3)           | 0.5(19)         | 5.4(18)         | 0.1(17)         |
| N1S  | 16(3)           | 44(4)           | 64(6)           | -1(4)           | 6(3)            | -1(3)           |
| Cu1  | 61.1(7)         | 42.0(5)         | 65.3(7)         | -2.9(5)         | -1.7(5)         | -0.9(4)         |
| O1S  | 110(7)          | 49(4)           | 131(8)          | -1(4)           | 2(6)            | -15(4)          |
| O2S  | 68(4)           | 59(4)           | 66(4)           | -10(3)          | 18(3)           | 0(3)            |
| N1   | 73(6)           | 61(4)           | 67(5)           | -3(4)           | 23(4)           | 4(4)            |
| N2   | 98(7)           | 41(4)           | 61(5)           | -5(3)           | -27(5)          | -5(4)           |
| N3   | 88(7)           | 77(6)           | 71(6)           | -2(5)           | -9(5)           | -6(5)           |
| C1   | 86(8)           | 66(6)           | 67(6)           | -10(5)          | 13(5)           | -15(5)          |
| C2   | 117(10)         | 55(5)           | 53(6)           | -5(4)           | 25(6)           | -33(6)          |
| C3   | 109(9)          | 47(5)           | 65(6)           | -4(4)           | -22(6)          | -8(5)           |
| C4   | 89(8)           | 57(5)           | 73(7)           | -18(5)          | -34(6)          | 22(5)           |
| O3S  | 73(6)           | 54(5)           | 72(6)           | 6(4)            | 9(5)            | 5(4)            |

**Table S4.** Bond lengths (Å) for **1**.

|     |                  |            |  |     |                  |           |
|-----|------------------|------------|--|-----|------------------|-----------|
| Mo1 | Mo2              | 3.2084(10) |  | Mo4 | O10              | 1.902(5)  |
| Mo1 | Mo4              | 3.1817(9)  |  | Mo4 | O11              | 1.706(5)  |
| Mo1 | O1               | 1.946(4)   |  | Mo4 | O12              | 1.721(5)  |
| Mo1 | O2               | 1.723(5)   |  | Mo4 | O13              | 2.273(4)  |
| Mo1 | O3               | 1.924(5)   |  | V1  | O1               | 1.946(4)  |
| Mo1 | O4               | 1.650(5)   |  | V1  | O2               | 1.723(5)  |
| Mo1 | O13 <sup>1</sup> | 2.396(5)   |  | V1  | O3               | 1.924(5)  |
| Mo1 | O13              | 2.166(5)   |  | V1  | O4               | 1.650(5)  |
| Mo2 | O1               | 1.985(5)   |  | V1  | O13              | 2.166(5)  |
| Mo2 | O3 <sup>1</sup>  | 2.326(5)   |  | V1  | O13 <sup>1</sup> | 2.396(5)  |
| Mo2 | O5               | 1.698(5)   |  | Cu1 | O1S              | 1.972(7)  |
| Mo2 | O6               | 1.904(5)   |  | Cu1 | O2S              | 2.341(7)  |
| Mo2 | O7               | 1.718(5)   |  | Cu1 | N1               | 2.001(8)  |
| Mo2 | O13              | 2.318(4)   |  | Cu1 | N2               | 1.993(8)  |
| Mo3 | O2 <sup>1</sup>  | 2.273(5)   |  | Cu1 | N3               | 1.979(10) |
| Mo3 | O6               | 1.916(5)   |  | N1  | C1               | 1.467(13) |
| Mo3 | O8               | 1.713(6)   |  | N2  | C2               | 1.449(14) |
| Mo3 | O9               | 1.709(6)   |  | N2  | C3               | 1.462(13) |
| Mo3 | O10              | 1.907(5)   |  | N3  | C4               | 1.496(13) |
| Mo3 | O13              | 2.409(5)   |  | C1  | C2               | 1.486(16) |
| Mo4 | O1 <sup>1</sup>  | 2.336(4)   |  | C3  | C4               | 1.476(17) |
| Mo4 | O3               | 1.977(5)   |  |     |                  |           |

<sup>1</sup>-X,-Y,-Z**Table S5.** Bond angles (°) for **1**.

|     |     |                  |            |  |     |     |                 |            |
|-----|-----|------------------|------------|--|-----|-----|-----------------|------------|
| Mo4 | Mo1 | Mo2              | 90.92(2)   |  | O10 | Mo4 | O3              | 147.54(19) |
| O1  | Mo1 | Mo2              | 35.72(14)  |  | O10 | Mo4 | O13             | 77.86(19)  |
| O1  | Mo1 | Mo4              | 124.52(14) |  | O11 | Mo4 | Mo1             | 86.96(18)  |
| O1  | Mo1 | O13              | 78.99(18)  |  | O11 | Mo4 | O1 <sup>1</sup> | 166.9(2)   |
| O1  | Mo1 | O13 <sup>1</sup> | 78.08(17)  |  | O11 | Mo4 | O3              | 97.9(2)    |
| O2  | Mo1 | Mo2              | 132.73(16) |  | O11 | Mo4 | O10             | 101.6(2)   |
| O2  | Mo1 | Mo4              | 132.66(16) |  | O11 | Mo4 | O12             | 104.2(3)   |
| O2  | Mo1 | O1               | 97.0(2)    |  | O11 | Mo4 | O13             | 95.4(2)    |
| O2  | Mo1 | O3               | 96.8(2)    |  | O12 | Mo4 | Mo1             | 135.5(2)   |
| O2  | Mo1 | O13              | 157.9(2)   |  | O12 | Mo4 | O1 <sup>1</sup> | 86.9(2)    |
| O2  | Mo1 | O13 <sup>1</sup> | 81.1(2)    |  | O12 | Mo4 | O3              | 100.7(2)   |
| O3  | Mo1 | Mo2              | 124.42(14) |  | O12 | Mo4 | O10             | 99.4(3)    |
| O3  | Mo1 | Mo4              | 35.91(14)  |  | O12 | Mo4 | O13             | 160.3(2)   |
| O3  | Mo1 | O1               | 150.0(2)   |  | O13 | Mo4 | Mo1             | 42.88(12)  |
| O3  | Mo1 | O13 <sup>1</sup> | 77.90(17)  |  | O13 | Mo4 | O1 <sup>1</sup> | 73.47(16)  |

|                  |     |                  |            |  |                  |     |                  |            |
|------------------|-----|------------------|------------|--|------------------|-----|------------------|------------|
| O3               | Mo1 | O13              | 78.24(18)  |  | O1               | V1  | O13 <sup>1</sup> | 78.08(17)  |
| O4               | Mo1 | Mo2              | 91.79(19)  |  | O1               | V1  | O13              | 78.99(18)  |
| O4               | Mo1 | Mo4              | 90.45(18)  |  | O2               | V1  | O1               | 97.0(2)    |
| O4               | Mo1 | O1               | 101.9(2)   |  | O2               | V1  | O3               | 96.8(2)    |
| O4               | Mo1 | O2               | 103.2(3)   |  | O2               | V1  | O13 <sup>1</sup> | 81.1(2)    |
| O4               | Mo1 | O3               | 100.7(2)   |  | O2               | V1  | O13              | 157.9(2)   |
| O4               | Mo1 | O13              | 98.9(2)    |  | O3               | V1  | O1               | 150.0(2)   |
| O4               | Mo1 | O13 <sup>1</sup> | 175.6(2)   |  | O3               | V1  | O13              | 78.24(18)  |
| O13              | Mo1 | Mo2              | 46.26(12)  |  | O3               | V1  | O13 <sup>1</sup> | 77.90(17)  |
| O13 <sup>1</sup> | Mo1 | Mo2              | 85.64(11)  |  | O4               | V1  | O1               | 101.9(2)   |
| O13              | Mo1 | Mo4              | 45.57(12)  |  | O4               | V1  | O2               | 103.2(3)   |
| O13 <sup>1</sup> | Mo1 | Mo4              | 86.03(11)  |  | O4               | V1  | O3               | 100.7(2)   |
| O13              | Mo1 | O13 <sup>1</sup> | 76.78(19)  |  | O4               | V1  | O13              | 98.9(2)    |
| O1               | Mo2 | Mo1              | 34.91(12)  |  | O4               | V1  | O13 <sup>1</sup> | 175.6(2)   |
| O1               | Mo2 | O3 <sup>1</sup>  | 72.92(18)  |  | O13              | V1  | O13 <sup>1</sup> | 76.78(19)  |
| O1               | Mo2 | O13              | 74.58(17)  |  | Mo1              | O1  | Mo2              | 109.4(2)   |
| O3 <sup>1</sup>  | Mo2 | Mo1              | 79.07(12)  |  | Mo2              | O1  | Mo4 <sup>1</sup> | 102.53(19) |
| O5               | Mo2 | Mo1              | 135.9(2)   |  | V1               | O1  | Mo2              | 109.4(2)   |
| O5               | Mo2 | O1               | 101.0(2)   |  | Mo1              | O3  | Mo4              | 109.3(2)   |
| O5               | Mo2 | O3 <sup>1</sup>  | 86.8(2)    |  | Mo4              | O3  | Mo2 <sup>1</sup> | 103.15(19) |
| O5               | Mo2 | O6               | 99.4(3)    |  | V1               | O3  | Mo4              | 109.3(2)   |
| O5               | Mo2 | O7               | 105.2(3)   |  | Mo2              | O6  | Mo3              | 116.4(3)   |
| O5               | Mo2 | O13              | 159.1(2)   |  | Mo4              | O10 | Mo3              | 115.8(2)   |
| O6               | Mo2 | Mo1              | 119.83(15) |  | Mo1              | O13 | Mo2              | 91.30(16)  |
| O6               | Mo2 | O1               | 147.55(19) |  | Mo1              | O13 | Mo3              | 166.0(2)   |
| O6               | Mo2 | O3 <sup>1</sup>  | 83.30(19)  |  | Mo1 <sup>1</sup> | O13 | Mo3              | 90.72(16)  |
| O6               | Mo2 | O13              | 77.39(19)  |  | Mo1              | O13 | Mo4              | 91.56(17)  |
| O7               | Mo2 | Mo1              | 87.29(18)  |  | Mo2              | O13 | Mo1 <sup>1</sup> | 96.22(16)  |
| O7               | Mo2 | O1               | 97.4(2)    |  | Mo2              | O13 | Mo3              | 86.70(16)  |
| O7               | Mo2 | O3 <sup>1</sup>  | 166.1(2)   |  | Mo4              | O13 | Mo1 <sup>1</sup> | 96.95(17)  |
| O7               | Mo2 | O6               | 101.3(2)   |  | Mo4              | O13 | Mo2              | 165.5(2)   |
| O7               | Mo2 | O13              | 95.7(2)    |  | Mo4              | O13 | Mo3              | 87.10(15)  |
| O13              | Mo2 | Mo1              | 42.44(12)  |  | V1               | O13 | Mo2              | 91.30(16)  |
| O13              | Mo2 | O3 <sup>1</sup>  | 72.32(16)  |  | V1               | O13 | Mo3              | 166.0(2)   |
| O2 <sup>1</sup>  | Mo3 | O13              | 71.16(17)  |  | V1               | O13 | Mo4              | 91.56(17)  |
| O6               | Mo3 | O2 <sup>1</sup>  | 78.02(19)  |  | O1S              | Cu1 | O2S              | 87.7(3)    |
| O6               | Mo3 | O13              | 74.92(19)  |  | O1S              | Cu1 | N1               | 92.2(4)    |
| O8               | Mo3 | O2 <sup>1</sup>  | 165.1(2)   |  | O1S              | Cu1 | N2               | 172.2(4)   |
| O8               | Mo3 | O6               | 98.3(2)    |  | O1S              | Cu1 | N3               | 96.7(4)    |
| O8               | Mo3 | O10              | 98.4(2)    |  | N1               | Cu1 | O2S              | 93.6(3)    |
| O8               | Mo3 | O13              | 93.9(2)    |  | N2               | Cu1 | O2S              | 99.4(3)    |
| O9               | Mo3 | O2 <sup>1</sup>  | 90.2(2)    |  | N2               | Cu1 | N1               | 84.2(4)    |
| O9               | Mo3 | O6               | 100.6(3)   |  | N3               | Cu1 | O2S              | 104.9(3)   |
| O9               | Mo3 | O8               | 104.7(3)   |  | N3               | Cu1 | N1               | 159.8(4)   |
| O9               | Mo3 | O10              | 103.7(3)   |  | N3               | Cu1 | N2               | 84.7(4)    |

|                 |     |                 |            |  |    |    |     |          |
|-----------------|-----|-----------------|------------|--|----|----|-----|----------|
| O9              | Mo3 | O13             | 161.3(2)   |  | C1 | N1 | Cu1 | 110.2(7) |
| O10             | Mo3 | O2 <sup>1</sup> | 78.22(19)  |  | C2 | N2 | Cu1 | 107.3(6) |
| O10             | Mo3 | O6              | 145.8(2)   |  | C2 | N2 | C3  | 114.4(9) |
| O10             | Mo3 | O13             | 74.37(19)  |  | C3 | N2 | Cu1 | 108.8(7) |
| O1 <sup>1</sup> | Mo4 | Mo1             | 80.22(11)  |  | C4 | N3 | Cu1 | 108.1(7) |
| O3              | Mo4 | Mo1             | 34.81(13)  |  | N1 | C1 | C2  | 106.7(9) |
| O3              | Mo4 | O1 <sup>1</sup> | 72.84(17)  |  | N2 | C2 | C1  | 109.3(8) |
| O3              | Mo4 | O13             | 74.64(18)  |  | N2 | C3 | C4  | 106.0(9) |
| O10             | Mo4 | Mo1             | 120.73(14) |  | C3 | C4 | N3  | 109.0(9) |
| O10             | Mo4 | O1 <sup>1</sup> | 83.11(19)  |  |    |    |     |          |

<sup>1</sup>-X,-Y,-Z

**Table S6.** H atoms coordinates ( $\text{\AA}\times 10^4$ ) and isotropic displacement parameters ( $\text{\AA}^2\times 10^3$ ) for **1**.

| Atom | x       | y       | z       | U(eq) |
|------|---------|---------|---------|-------|
| H1SC | 5624.4  | -410.1  | 130.8   | 62    |
| H1SD | 4376.4  | -59.5   | 387.2   | 62    |
| H1SE | 5331.6  | 565.7   | 43.3    | 62    |
| H1SF | 4669.6  | -93.6   | -558.9  | 62    |
| H1SA | 2874.53 | -963.78 | 4269.4  | 146   |
| H1SB | 2147.83 | -933.48 | 3406.6  | 146   |
| H2SA | 4432.46 | 985.67  | 5207.52 | 96    |
| H2SB | 3186.46 | 1315.57 | 5507.52 | 96    |
| H1A  | 4971.62 | -6.77   | 3637.06 | 79    |
| H1B  | 4355.29 | -82.86  | 2692.27 | 79    |
| H2   | 3549.29 | 2374.39 | 3736.84 | 81    |
| H3A  | 286.78  | 926.53  | 3215.69 | 95    |
| H3B  | 463.19  | 1092.1  | 4221.47 | 95    |
| H1C  | 5863.54 | 1003.23 | 2427.66 | 87    |
| H1D  | 5751.37 | 1437.21 | 3448    | 87    |
| H2A  | 4639.65 | 2483.42 | 2411.54 | 89    |
| H2B  | 3793.91 | 1636.97 | 1930.82 | 89    |
| H3C  | 1656.04 | 2210.11 | 2199.92 | 90    |
| H3D  | 2072.46 | 3156.62 | 2759.7  | 90    |
| H4A  | -2.04   | 2500.02 | 3241    | 89    |
| H4B  | 1096.26 | 2604.8  | 4085.53 | 89    |
| H3SA | -411.9  | 2104.13 | 5866.96 | 99    |
| H3SB | -879.3  | 1235.93 | 5553.26 | 99    |

**Table S7.** Atomic occupancy for **1**.

| Atom      | Mo1 | V1  | H1SC | H1SD | H1SE | H1SF | O3S  | H3SA | H3SB |
|-----------|-----|-----|------|------|------|------|------|------|------|
| Occupancy | 0.5 | 0.5 | 0.5  | 0.5  | 0.5  | 0.5  | 0.75 | 0.75 | 0.75 |

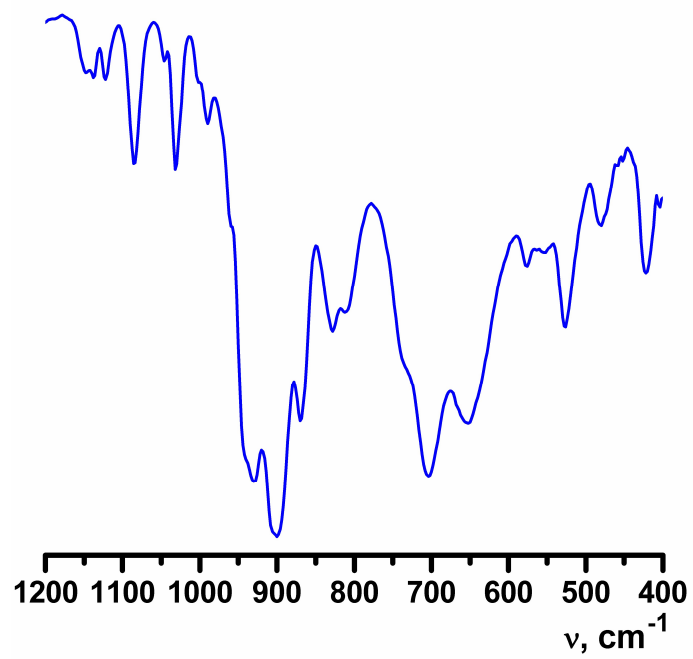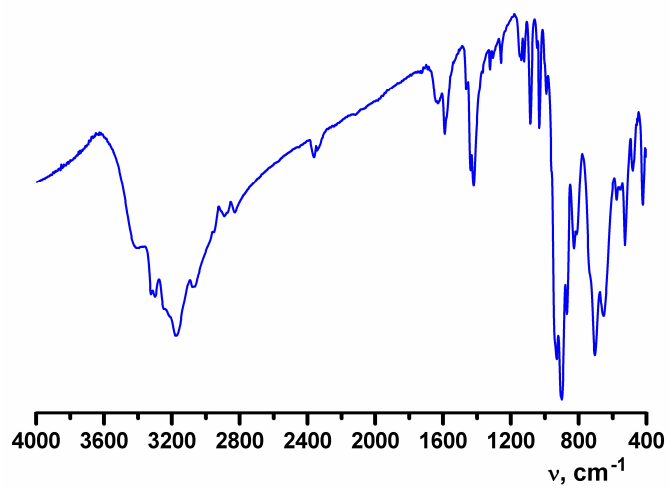

**Figure S1.** FTIR spectra of the title compound recorded in KBr pellets.



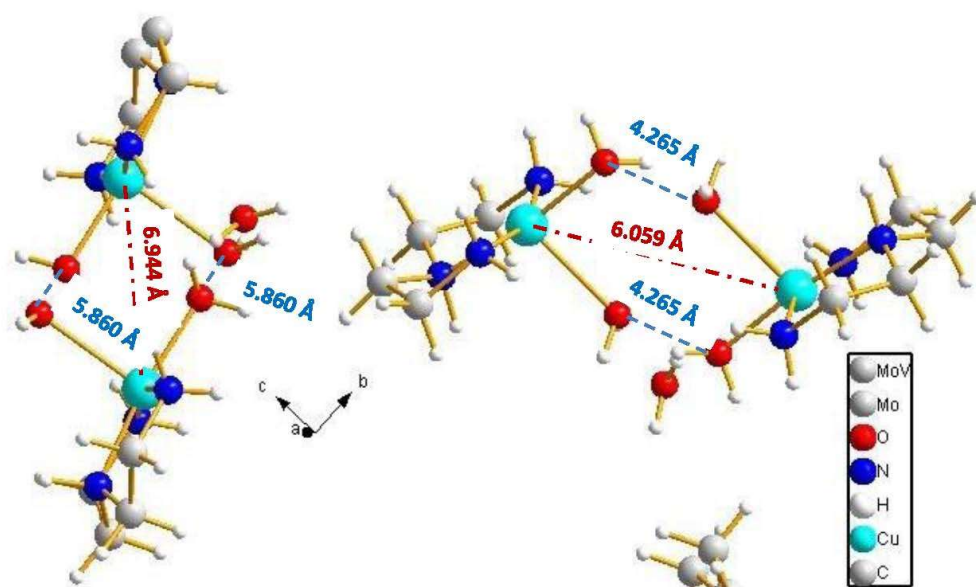

**Figure S2.** Fragment of the crystal structure of the title compound showing intermolecular contacts Cu–O···O–Cu as dashed blue lines responsible for the weak antiferromagnetic exchange.

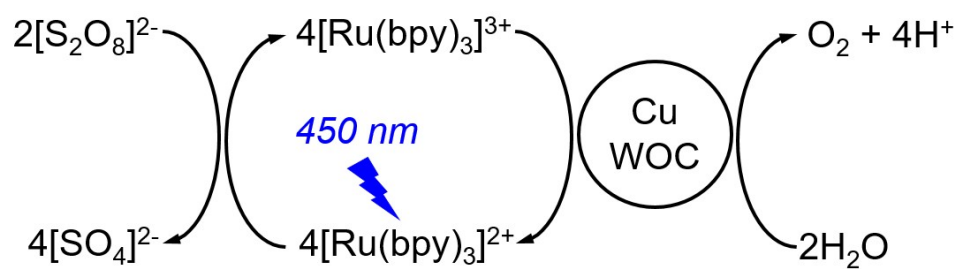

**Figure S3.** Scheme of the water oxidation catalysis using persulfate as electron acceptor, tris(bipyridine)ruthenium(II) as light harvester and the title compound as a water oxidation catalyst (WOC).

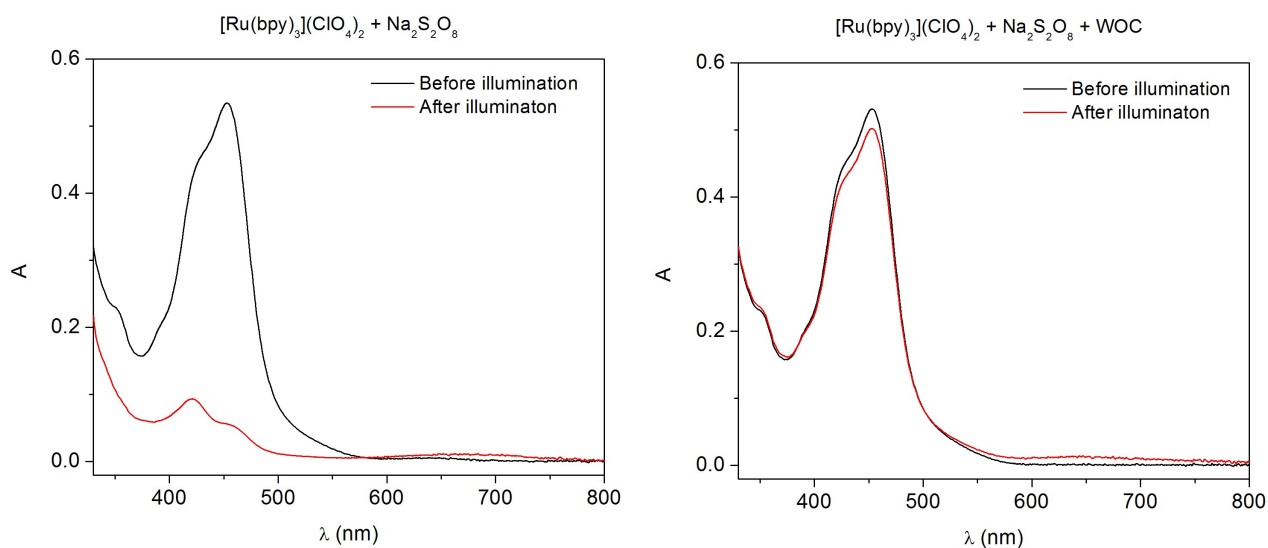

**Figure S4.** Left: steady-state UV-Vis absorption spectrum of the solution containing  $[\text{Ru}(\text{bpy})_3](\text{ClO}_4)_2$  (0.05 mM),  $\text{Na}_2\text{S}_2\text{O}_8$  (1 mM) in borate buffer (pH 8.0) (black). After illumination of the cuvette at 450 nm during 10 s, the spectrum was recorded showing oxidation of  $\text{Ru}^{\text{II}}$  to  $\text{Ru}^{\text{III}}$  (red) as evidenced by the disappearance of the  $\text{Ru}^{\text{II}}$  band at  $\lambda_{\text{max}} = 453$  nm. Right: the spectra of the solution containing  $[\text{Ru}(\text{bpy})_3](\text{ClO}_4)_2$  (0.05 mM),  $\text{Na}_2\text{S}_2\text{O}_8$  (1 mM), and **1** (0.004 mM) in borate buffer (pH 8.0) before and after illumination. Accumulation of  $\text{Ru}^{\text{III}}$  is not observed.

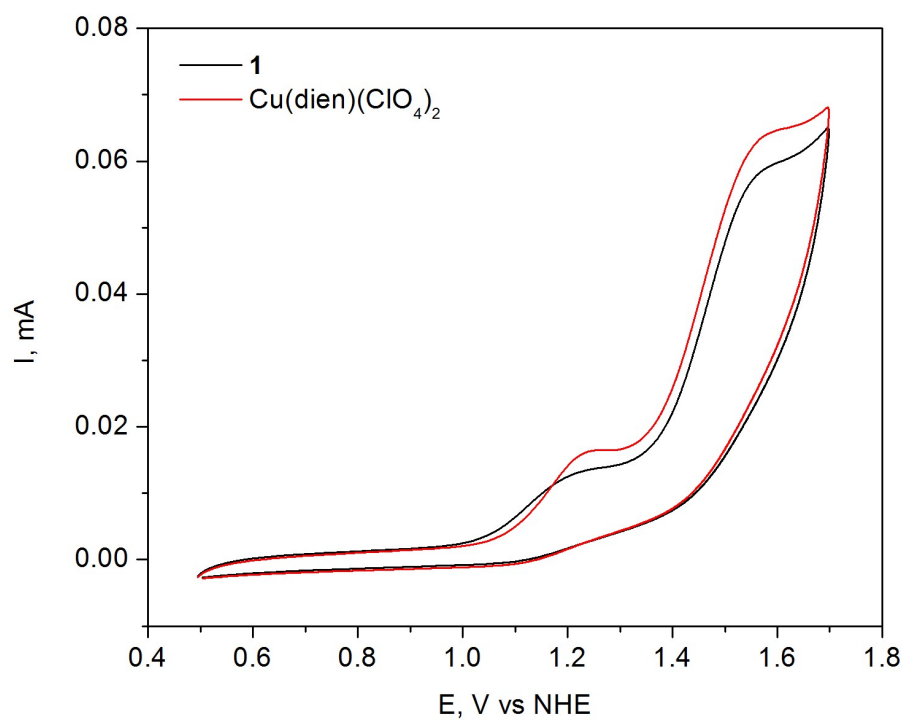

**Figure S5.** Cyclic voltammograms of **1** (black) and  $\text{Cu(dien)(ClO}_4)_2$  (red), 0.25 mM, recorded at a scan rate of  $100 \text{ mV s}^{-1}$  in borate buffer (0.04 M, pH = 8.0) with supporting electrolyte  $\text{KClO}_4$  (0.1 M).

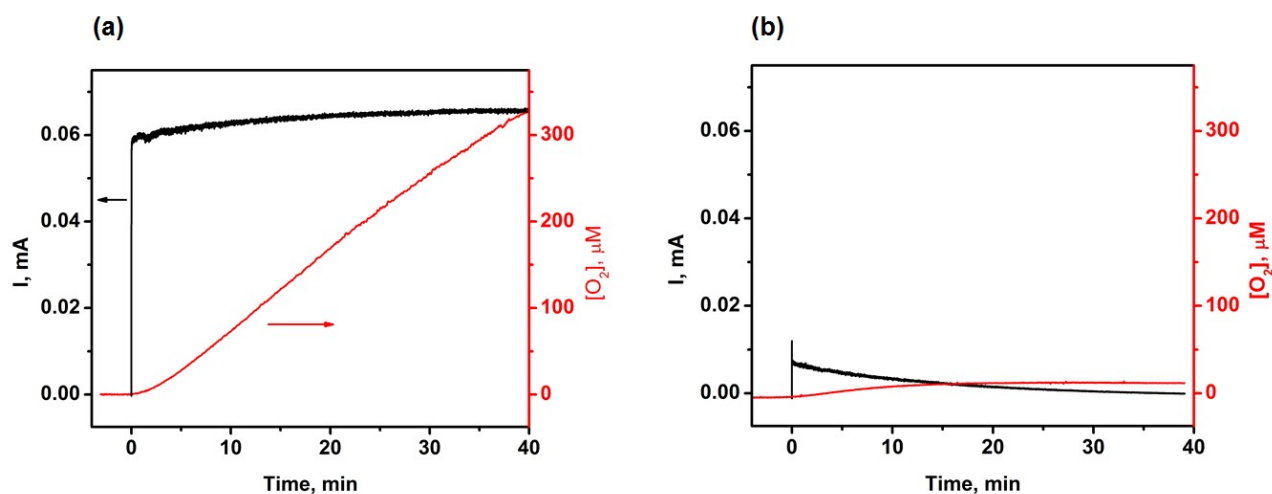

**Figure S6.** (a) Controlled potential electrolysis of the aqueous solution containing **1** (0.1 mM) and supporting electrolyte  $\text{KClO}_4$  (0.1 M) in borate buffer (0.04 M, pH 8.0) with electric current shown in black and evolved oxygen in red. (b) Controlled potential electrolysis of the aqueous solution containing supporting electrolyte  $\text{KClO}_4$  (0.1 M) in borate buffer (0.04 M, pH 8.0) only carried out using the working electrode transferred from the solution “a” after 45 min of electrolysis. The potential in all experiments was 1.55 V vs NHE.
